# Supplementary material for: An Investigation into the Effect of Emissions from Industrial Complexes on Air Quality in the Ulsan Metropolitan City Utilizing Trace Components in PM2.5
Source: MDPI journal article supplement (doi:10.3390/app112110003), 2021-10-26
Supplement: s1 [file s1]

# An Investigation into the Effect of Emissions from Industrial Complexes on Air Quality in the Ulsan Metropolitan City Utilizing Trace Components in PM2.5

Won Jun Choi, Bujeon Jung, Dongwon Lee, Hyunjung Kang, Hyosun Kim, Hyunkee Hong

**Table S1.** Annual average concentrations of particulate matter with an aerodynamic diameter  $\leq 2.5 \mu\text{m}$  (PM2.5) and particulate matter with an aerodynamic diameter  $\leq 10 \mu\text{m}$  (PM10) according to wind direction (degree) (Unit:  $\mu\text{g}/\text{m}^3$ ).

| Wind Direction |                    | 0    | 22.5 | 45   | 67.5 | 90   | 112.5 | 135  | 157.5 | 180  | 202.5 | 225  | 247.5 | 270  | 292.5 | 315  | 337.5 |
|----------------|--------------------|------|------|------|------|------|-------|------|-------|------|-------|------|-------|------|-------|------|-------|
| PM2.5          | Average            | 16.1 | 15.7 | 14.3 | 13.7 | 15.5 | 18.6  | 24.1 | 24.2  | 18.5 | 15.6  | 19.8 | 21.2  | 20.1 | 18.9  | 19.0 | 18.3  |
|                | Standard Deviation | 12.4 | 12.3 | 10.6 | 10.8 | 11.7 | 12.9  | 12.6 | 12.1  | 12.1 | 10.7  | 12.6 | 13.5  | 12.5 | 12.5  | 13.2 | 13.5  |
|                | Number             | 856  | 513  | 244  | 285  | 315  | 175   | 355  | 281   | 225  | 503   | 282  | 150   | 282  | 743   | 1330 | 1530  |
| PM10           | Average            | 28.3 | 27.8 | 26.7 | 26.8 | 27.6 | 33.2  | 43.0 | 41.8  | 32.9 | 30.2  | 35.8 | 39.7  | 35.3 | 33.3  | 32.5 | 31.0  |
|                | Standard Deviation | 19.5 | 17.8 | 18.0 | 17.9 | 17.0 | 19.0  | 22.6 | 19.6  | 20.1 | 18.2  | 21.2 | 27.6  | 20.2 | 19.7  | 20.8 | 20.9  |
|                | Number             | 867  | 522  | 247  | 294  | 325  | 180   | 355  | 282   | 223  | 506   | 285  | 151   | 284  | 745   | 1335 | 1553  |

**Table S2.** Mean concentrations of PM10 and PM2.5 and the mass concentrations of PM2.5 components, obtained from hourly data in Ulsan.

|                                                                                                                                                                                          |        | PM <sub>2.5</sub> PM <sub>10</sub> |      | Ions (μg/m <sup>3</sup> )     |                              |                 |                 |                              |                  | Carbon (μg/m <sup>3</sup> ) |      | Elements (ng/m <sup>3</sup> ) |       |       |      |     |      |      |      |      |  |
|------------------------------------------------------------------------------------------------------------------------------------------------------------------------------------------|--------|------------------------------------|------|-------------------------------|------------------------------|-----------------|-----------------|------------------------------|------------------|-----------------------------|------|-------------------------------|-------|-------|------|-----|------|------|------|------|--|
|                                                                                                                                                                                          |        |                                    |      | SO <sub>4</sub> <sup>2-</sup> | NO <sub>3</sub> <sup>-</sup> | Cl <sup>-</sup> | Na <sup>+</sup> | NH <sub>4</sub> <sup>+</sup> | Ca <sup>2+</sup> | OC                          | EC   | K                             | Ti    | V     | Mn   | Fe  | Ni   | Zn   | As   | Pb   |  |
| 2017                                                                                                                                                                                     | DJF    | 20.1                               | 32.0 | 1.91                          | 2.90                         | 0.21            | 0.13            | 1.51                         | 0.03             | 2.51                        | 0.58 | 205                           | 6.31  | 1.84  | 13.6 | 154 | 1.13 | 46.3 | 2.74 | 15.0 |  |
|                                                                                                                                                                                          | MAM    | 21.3                               | 41.0 | 2.68                          | 2.72                         | 0.20            | 0.13            | 1.76                         | 0.06             | 3.40                        | 0.65 | 208                           | 15.21 | 10.45 | 19.7 | 248 | 3.89 | 68.5 | 6.72 | 21.1 |  |
|                                                                                                                                                                                          | JJA    | 14.1                               | 25.4 | 4.00                          | 1.40                         | 0.17            | 0.22            | 1.96                         | 0.03             | 2.58                        | 0.57 | 82                            | 8.57  | 13.45 | 17.7 | 159 | 4.64 | 72.9 | 6.10 | 16.9 |  |
|                                                                                                                                                                                          | SON    | 18.3                               | 30.7 | 2.47                          | 1.66                         | 0.22            | 0.18            | 1.29                         | 0.07             | 3.13                        | 0.69 | 174                           | 6.90  | 4.47  | 15.6 | 177 | 1.91 | 53.3 | 3.41 | 12.8 |  |
|                                                                                                                                                                                          | Yearly | 18.5                               | 32.4 | 2.67                          | 2.26                         | 0.20            | 0.16            | 1.62                         | 0.05             | 2.91                        | 0.62 | 170                           | 9.31  | 7.39  | 16.6 | 186 | 2.85 | 59.9 | 4.72 | 16.5 |  |
| OC: organic carbon; EC: elemental carbon; DJF: December/January/February (winter); MAM: March/April/May (Spring); JJA: June/July/August (Summer); SON: September/October/November (Fall) |        |                                    |      |                               |                              |                 |                 |                              |                  |                             |      |                               |       |       |      |     |      |      |      |      |  |

**Table S3.** Annual average concentrations of vanadium (V) in PM2.5 according to wind direction (degree) (Unit:  $\mu\text{g}/\text{m}^3$ ).

| Wind Direction |                    | 0    | 22.5 | 45   | 67.5  | 90   | 112.5 | 135   | 157.5 | 180   | 202.5 | 225   | 247.5 | 270  | 292.5 | 315  | 337.5 |
|----------------|--------------------|------|------|------|-------|------|-------|-------|-------|-------|-------|-------|-------|------|-------|------|-------|
| V              | Average            | 3.60 | 3.51 | 3.88 | 4.87  | 4.97 | 15.75 | 32.03 | 26.55 | 16.68 | 8.01  | 7.62  | 7.52  | 5.29 | 3.20  | 3.25 | 3.37  |
|                | Standard Deviation | 9.57 | 6.71 | 9.52 | 10.93 | 8.35 | 24.60 | 29.39 | 25.65 | 24.19 | 9.85  | 10.78 | 16.90 | 7.71 | 6.19  | 7.03 | 10.11 |
|                | Number             | 814  | 477  | 222  | 276   | 301  | 173   | 316   | 258   | 210   | 429   | 272   | 145   | 266  | 703   | 1269 | 1487  |

**Table S4.** Number of cases for each season according to wind direction (degree) (Unit:  $\text{m}/\text{s}^3$ ).

| Wind Direction |     | 0   | 22.5 | 45 | 67.5 | 90  | 112.5 | 135 | 157.5 | 180 | 202.5 | 225 | 247.5 | 270 | 292.5 | 315 | 337.5 | ND   |
|----------------|-----|-----|------|----|------|-----|-------|-----|-------|-----|-------|-----|-------|-----|-------|-----|-------|------|
| DJF            | ALL | 170 | 69   | 28 | 29   | 26  | 18    | 23  | 23    | 23  | 69    | 45  | 36    | 75  | 376   | 604 | 467   | 2081 |
|                | SC  | 5   | 5    | 3  | 1    | 2   | 2     | 4   | 1     | 1   | 3     | 1   | 0     | 1   | 21    | 22  | 10    | 7    |
| MAM            | ALL | 166 | 132  | 63 | 73   | 79  | 69    | 148 | 114   | 85  | 170   | 93  | 57    | 95  | 177   | 263 | 299   | 2083 |
|                | SC  | 10  | 9    | 5  | 6    | 6   | 18    | 81  | 49    | 20  | 15    | 9   | 5     | 9   | 9     | 26  | 18    | 30   |
| JJA            | ALL | 199 | 143  | 74 | 112  | 153 | 65    | 155 | 116   | 89  | 222   | 92  | 34    | 77  | 85    | 184 | 286   | 2086 |

|     |     |     |     |    |    |    |    |    |    |    |    |    |    |    |     |     |     |      |
|-----|-----|-----|-----|----|----|----|----|----|----|----|----|----|----|----|-----|-----|-----|------|
|     | SC  | 18  | 8   | 6  | 5  | 5  | 14 | 88 | 49 | 22 | 27 | 8  | 3  | 8  | 9   | 13  | 25  | 54   |
| SON | ALL | 348 | 191 | 88 | 84 | 77 | 31 | 33 | 37 | 31 | 57 | 61 | 25 | 41 | 117 | 305 | 536 | 2062 |
|     | SC  | 9   | 9   | 3  | 8  | 9  | 5  | 13 | 9  | 4  | 3  | 3  | 2  | 2  | 4   | 15  | 20  | 20   |

N.D.: Wind direction could not be specified.

**Table S5.** Mass concentrations of PM10 and components in PM2.5, obtained from hourly data in Ulsan for selected cases (SC).

|    |        | PM <sub>2.5</sub> | PM <sub>10</sub> | Ions (µg/m <sup>3</sup> )     |                              |                 |                 |                              |                  | Carbon (µg/m <sup>3</sup> ) |      | Elements (ng/m <sup>3</sup> ) |      |      |      |     |      |     |      |      |
|----|--------|-------------------|------------------|-------------------------------|------------------------------|-----------------|-----------------|------------------------------|------------------|-----------------------------|------|-------------------------------|------|------|------|-----|------|-----|------|------|
|    |        |                   |                  | SO <sub>4</sub> <sup>2-</sup> | NO <sub>3</sub> <sup>-</sup> | Cl <sup>-</sup> | Na <sup>+</sup> | NH <sub>4</sub> <sup>+</sup> | Ca <sup>2+</sup> | OC                          | EC   | K                             | Ti   | V    | Mn   | Fe  | Ni   | Zn  | As   | Pb   |
|    | DJF    | 25.1              | 38.7             | 3.21                          | 2.95                         | 0.21            | 0.15            | 2.11                         | 0.03             | 2.86                        | 0.71 | 220                           | 20.7 | 34.6 | 70.6 | 369 | 12.5 | 123 | 18.5 | 39.0 |
|    | MAM    | 27.0              | 50.7             | 4.46                          | 3.61                         | 0.47            | 0.17            | 2.63                         | 0.05             | 4.21                        | 1.01 | 177                           | 25.2 | 51.2 | 44.5 | 340 | 16.7 | 138 | 18.7 | 45.2 |
| SC | JJA    | 27.0              | 42.8             | 6.38                          | 2.88                         | 0.33            | 0.24            | 3.29                         | 0.04             | 4.32                        | 1.03 | 134                           | 27.0 | 57.8 | 50.5 | 308 | 18.1 | 183 | 17.4 | 51.5 |
|    | SON    | 23.9              | 35.8             | 3.13                          | 1.96                         | 0.24            | 0.20            | 1.63                         | 0.09             | 4.30                        | 1.08 | 157                           | 15.9 | 45.0 | 47.9 | 307 | 14.4 | 147 | 15.4 | 44.3 |
|    | Yearly | 26.3              | 44.1             | 4.97                          | 3.05                         | 0.36            | 0.20            | 2.73                         | 0.05             | 4.10                        | 1.00 | 157                           | 24.9 | 53.3 | 47.9 | 323 | 17.0 | 158 | 17.8 | 47.7 |

OC: organic carbon; EC: elemental carbon; DJF: December/January/February (winter); MAM: March/April/May (Spring); JJA: June/July/August (Summer); SON: September/October/November (Fall)

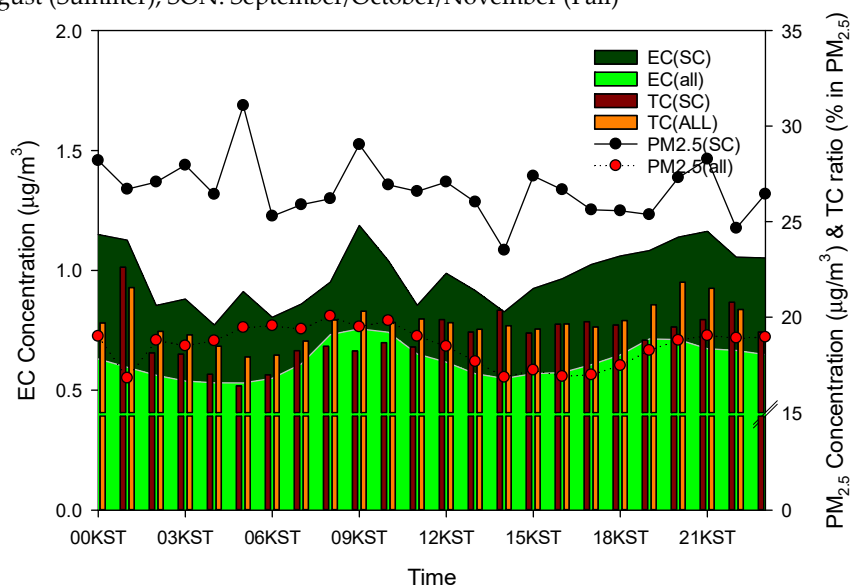

**Figure S1.** Diurnal changes in the concentration of PM2.5, and the ratio of total carbon (TC; OC+EC) to PM2.5 in SCs.

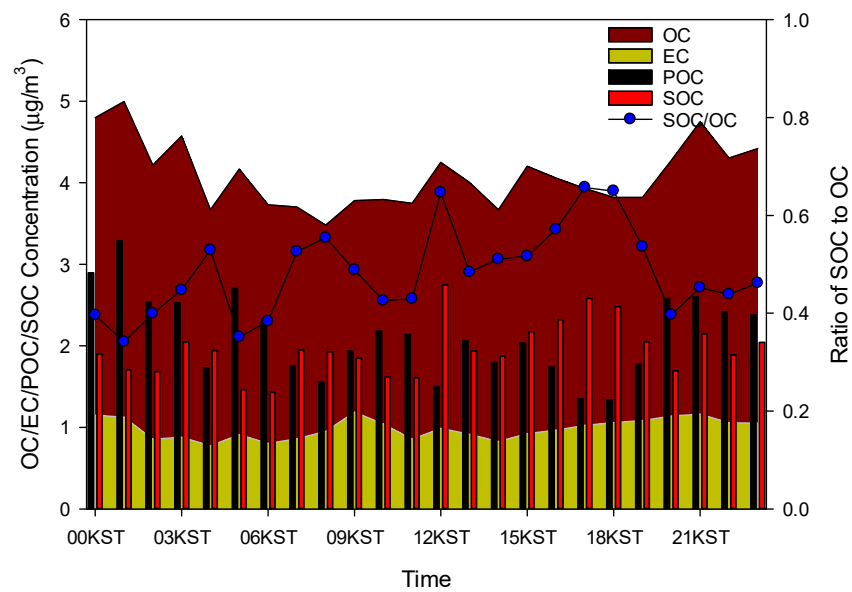

**Figure S2.** Diurnal change in the concentration of organic carbon (OC), element carbon (EC), primary organic carbon (POC), secondary organic carbon (SOC), and the ratio of SOC to OC in SCs.
